# Supplementary material
Source: PubMed Central journal article supplement (PMC3124252)

**A**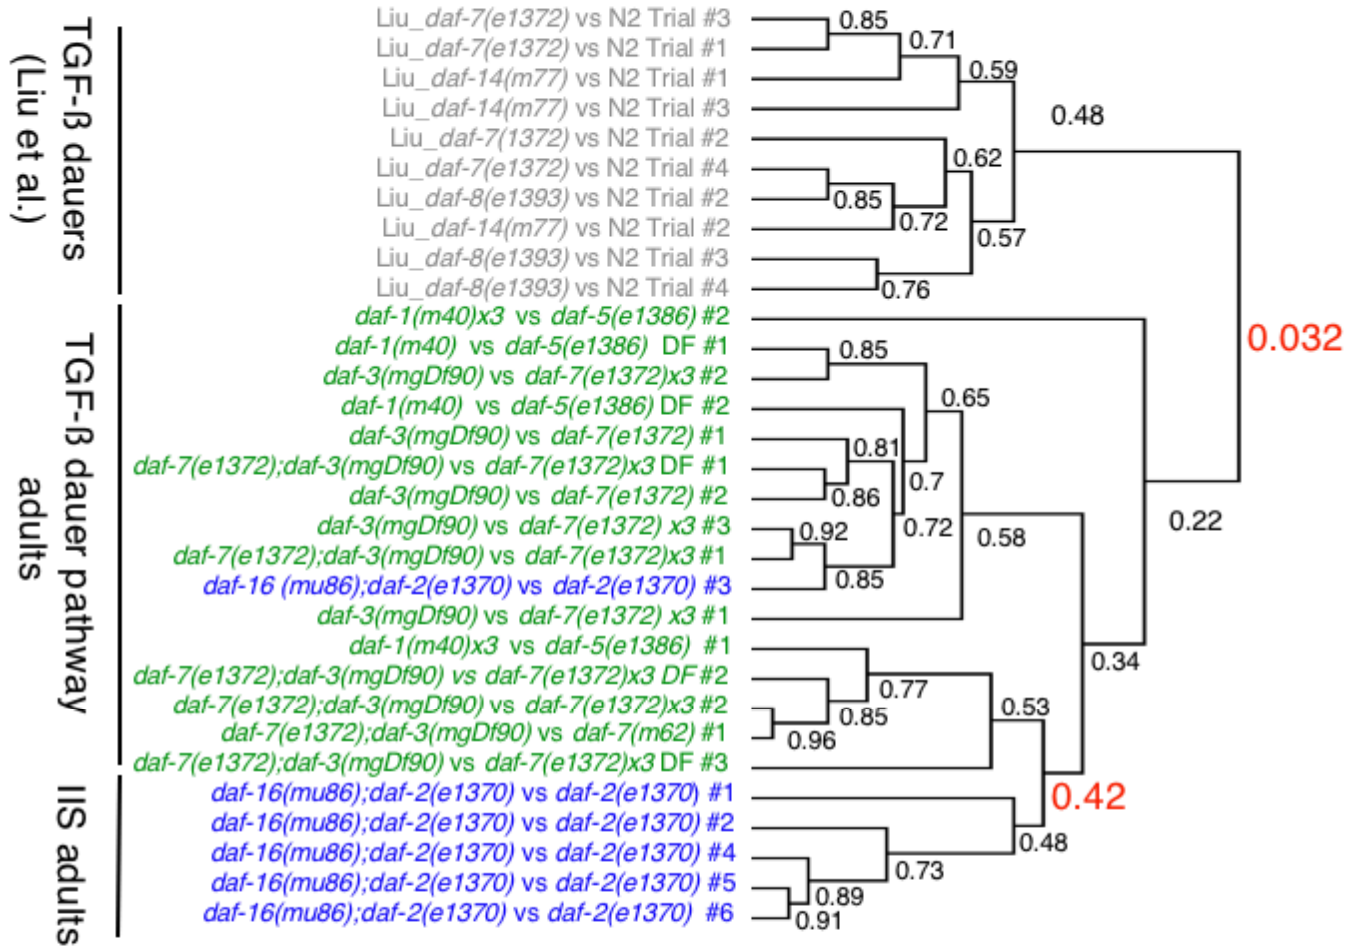

## A TGF- $\beta$ adults

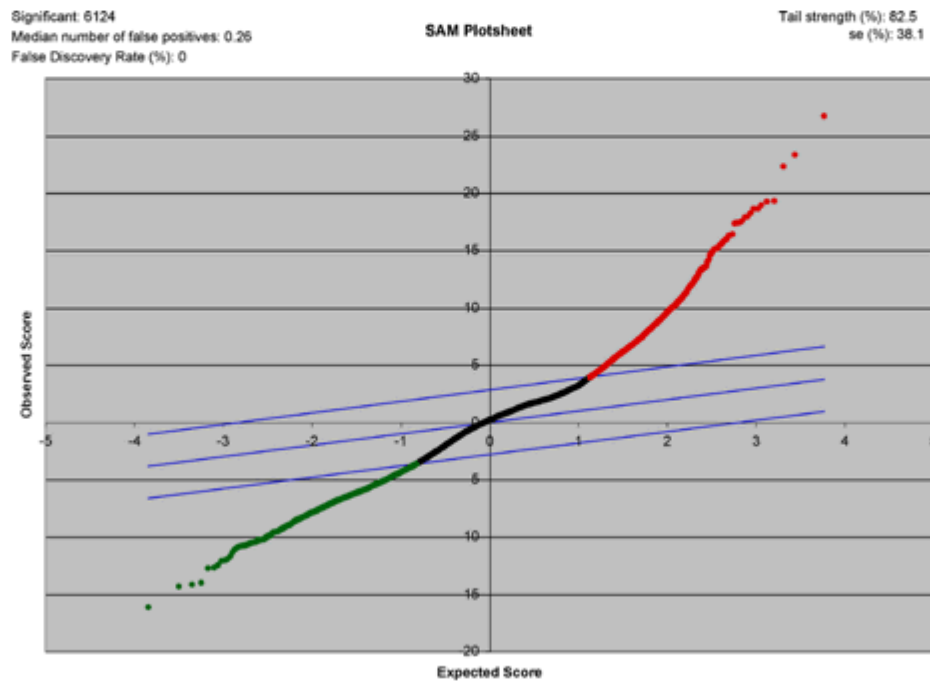

## B TGF- $\beta$ adults

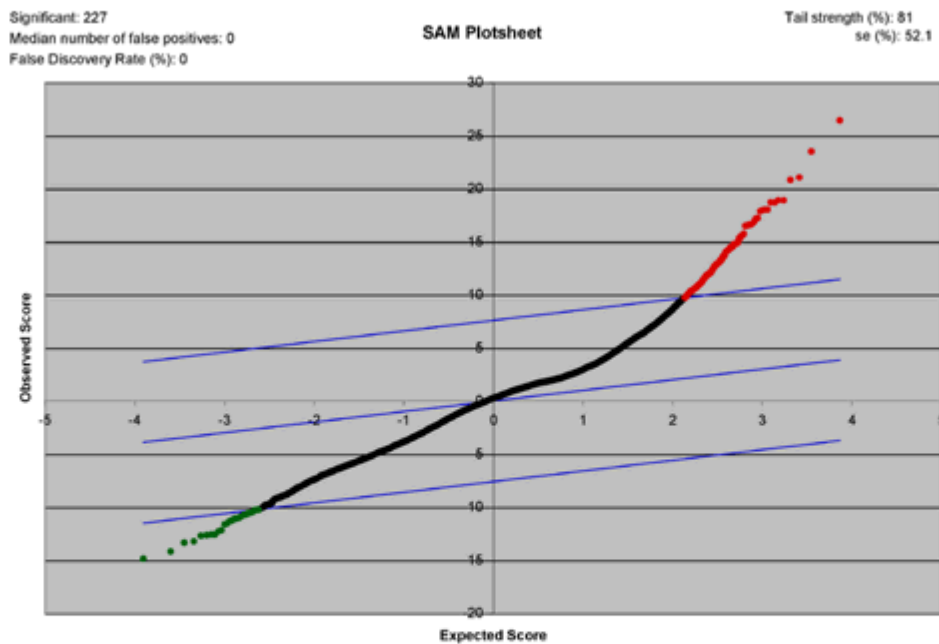

### TGF- $\beta$ dauer pathway adults

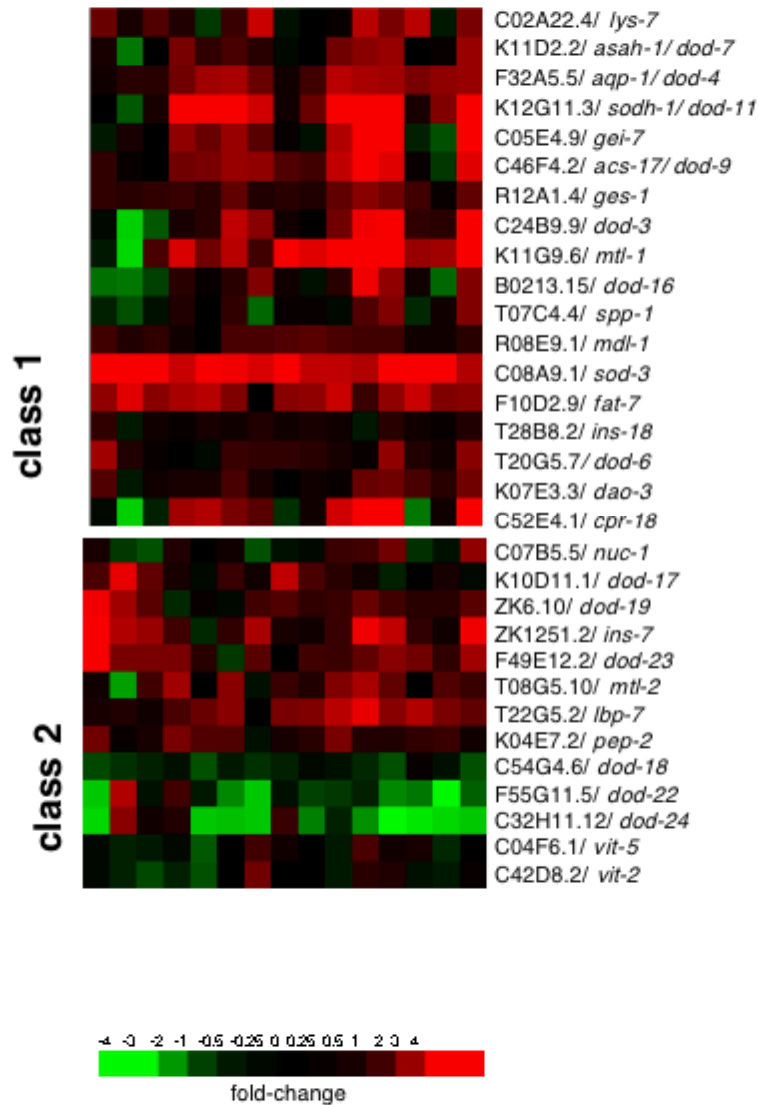

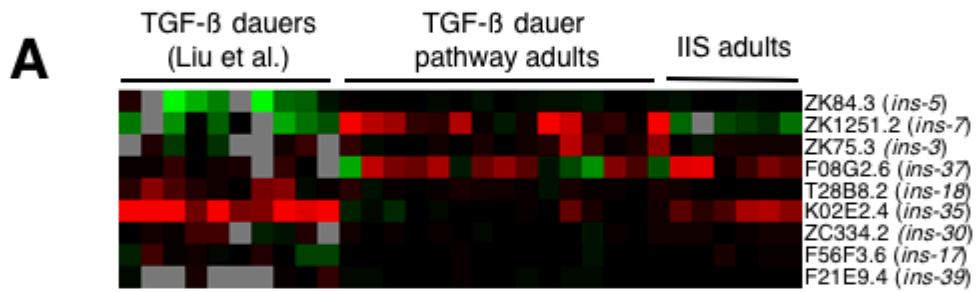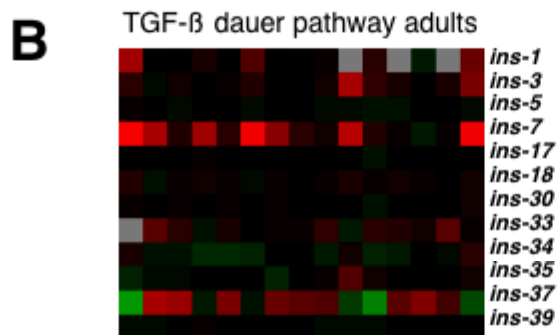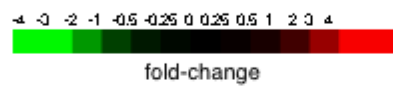

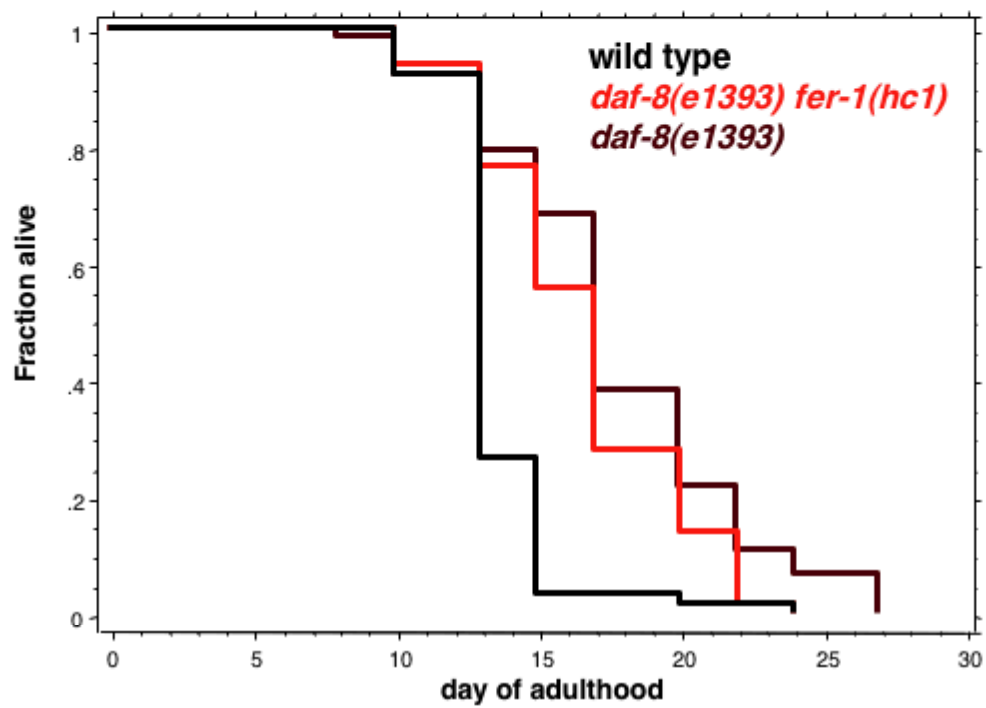

Supp. Fig. 5

Supplement: NIHMS302160-supplement-01.pdf [file NIHMS302160-supplement-01.pdf]
